# Supplementary material for: Effects of L-DOPA on Gene Expression in the Frontal Cortex of Rats with Unilateral Lesions of Midbrain Dopaminergic Neurons
Source: eNeuro. 2021 Jan 15;8(1):ENEURO.0234-20.2020. doi: 10.1523/ENEURO.0234-20.2020 (PMC7877460; doi:10.1523/ENEURO.0234-20.2020)
Supplement: Extended Data Figure 1-1 — Number of contraversive (rightwise) and ipsiversive (leftwise) rotations recorded for 1 h in 10-min intervals in rats from both treatment groups, RINs for frontal cortex samples and information on whether the animals were included in the RNA-Seq study. The rats were tested 14 d after administration of 6-OHDA into the left MFB after injection of apomoprhine (0.25 mg/kg/2 ml, s.c.). N/A, not measured. Download Figure 1-1, XLSX file. [file enu-eN-NWR-0234-20-s01.xlsx]

## Sheet: Figure 1-1
Animal ID	Group	Number of contraversive rotations in 10-minute intervals						Total number of contraversive rotations	Number of ipsiversive rotations in 10-minute intervals						Total number of ipsiversive rotations	RINs for frontal cortex samples		Animal included in RNA-seq study?
		10 minutes	20	30	40	50	60		10 minutes	20	30	40	50	60		right hemisphere	left hemisphere
L1*	L-DOPA	22.5	22.25	24	20	20	12.75	121.5	0	0	0	0	0	0.75	0.75	9.7	9.2	yes
L10*	saline	53.75	36.25	38.75	41.75	34.75	30	235.25	0	0	0	0	0	0	0	9.8	10	yes
L11*	saline	47	46.75	74.5	108	94	27.25	397.5	0	0	0	0	0	0	0	9.8	9.9	yes
L2*	L-DOPA	21.25	48	58.25	71.25	36.5	4.75	240	1	0	0	0	0	0	1	N/A	9.5	yes
L20	saline	14	19	29.25	32.5	14.5	1	110.25	6	2.5	0.5	1.25	1.5	0.75	12.5	9.7	8.7	no
L21	L-DOPA	18.75	55	52.5	45.5	32.25	35.5	239.5	0	0	0	0	0	0	0	N/A	N/A	no
L21	saline	20.5	22.75	23.75	18.75	13	1	99.75	0	0	0	0	0	0	0	N/A	N/A	no
L23	saline	34.5	33	55.5	63.75	39.25	4	230	1.75	1.25	0.25	0	2.25	8.75	14.25	9.5	9.1	yes
L23	L-DOPA	27	51.25	43	24	16	5.25	166.5	0	0	0	0	0	0	0	N/A	N/A	no
L24	L-DOPA	17.25	50.75	68.25	54	41.75	23	255	0	0	0	0	0	0	0	N/A	N/A	no
L3*	L-DOPA	14	14.25	37.5	34.5	21.25	19.75	141.25	0	0	0	0	0	0.5	0.5	N/A	N/A	no
L32	saline	27.5	16	20.75	30.5	44.25	43.25	182.25	0	0	0	0	0	0	0	9.8	9.5	yes
L39	saline	71	112.25	78.5	75.5	54.5	44.25	436	3.5	2.25	0	0.25	0	0	6	9.3	9.5	yes
L4*	L-DOPA	48.25	41.5	31	22.5	35.75	25.5	204.5	0	0	0	0	0.25	0	0.25	9.1	9.4	yes
L5*	L-DOPA	63.25	45.25	38.5	34.5	54.5	31.75	267.75	0	0.25	0	0	0	0	0.25	7.2	9.6	yes
L6*	L-DOPA	35	35.25	54.5	42.25	36.25	23.75	227	0	0	0	0	0	0	0	9.7	10	yes
L7*	saline	55	69	81.25	85.75	84.75	62	437.75	0	0	0	0	0	0	0	N/A	N/A	no
L8*	saline	32.25	26.25	22.5	22.5	18.75	13.75	136	0	0	0	0	0.25	0.5	0.75	9.2	7.8	no
L9*	saline	38	20.75	24.75	18.5	22.25	22	146.25	0	0	0	0	0.25	0	0.25	N/A	N/A	no

## Sheet: Description
Figure 1-1	Number of contraversive (rightwise) and ipsiversive (leftwise) rotations recorded for 1 hour in 10-minute intervals in rats from both treatment groups, RINs for frontal cortex samples and information on whether the animals were included in the RNA-Seq study. The rats were tested 14 days after administration of 6-OHDA into the left medial forebrain bundle after injection of apomoprhine (s.c. 0.25 …
