# Supplementary material for: Effects of L-DOPA on Gene Expression in the Frontal Cortex of Rats with Unilateral Lesions of Midbrain Dopaminergic Neurons
Source: eNeuro. 2021 Jan 15;8(1):ENEURO.0234-20.2020. doi: 10.1523/ENEURO.0234-20.2020 (PMC7877460; doi:10.1523/ENEURO.0234-20.2020)
Supplement: Extended Data Figure 2-2 — List of alternative transcripts of the differentially expressed genes with Ensembl transcript IDs and names, gene symbols, log2(FPKM +1) values in each sample and mean for all samples, uncorrected p and FDR values for all factors, and fold changes for each contrast. Download Figure 2-2, XLSX file. [file enu-eN-NWR-0234-20-s03.xlsx]

## Sheet: Figure_2-2
No.	Ensembl transcript ID	Ensembl transcript name	Gene symbol	q1_0	q2_0	q3_0	q4_0	q5_0	q6_0	q7_0	q8_0	q9_0	q10_0	q11_0	q12_0	q13_0	q14_0	q15_0	q16_0	q17_0	q18_0	q19_0	q20_0	Mean log2(FPKM + 1)	P hemisphere	P treatment	P interaction	FDR hemisphere	FDR treatment	FDR interaction	Fold change - treatment	Fold change - hemisphere
1	ENSRNOT00000001014	Rnf39-201	Rnf39	1.88153	1.95607	1.98299	2.0306	1.82481	2.15282	2.09787	2.15195	2.17446	2.16355	1.95208	2.03623	1.93398	2.12049	2.00174	2.15569	2.08712	2.22074	2.19295	2.1108	2.06142	0.183984	1.09443e-05	0.247081	0.788504	8.20821e-05	0.668399	0.357487	0.07903
2	ENSRNOT00000003638	Mtmr1-201	Mtmr1	0.810815	1.19241	1.72943	1.44672	0.700977	0.0323627	0.0105492	0.541724	0.0337281	0.820875	1.87725	5.42259e-05	2.20424	1.35055	1.42749	1.79331	2.45968	0.0125463	2.11438	1.22637	1.08927	0.0360145	0.253954	0.116037	0.270109	0.362791	0.668399	-0.738884	1.42926
3	ENSRNOT00000009584	Zfp189-201	Zfp189	1.66022	1.88977	1.82503	1.98331	1.66135	2.2768	2.07808	2.19407	2.25347	2.27798	1.76937	1.8269	1.82322	1.97851	1.61015	2.26312	2.0208	2.19148	2.27459	2.24471	2.00515	0.856293	9.6711e-07	0.890081	0.928151	9.6711e-06	0.981194	0.809449	-0.0194441
4	ENSRNOT00000009979	Grasp-201	Grasp	2.59332	2.61409	2.66873	2.69425	2.60278	2.68735	2.69921	2.6494	2.68529	2.72211	2.57712	2.6116	2.5612	2.62322	2.64137	2.71537	2.71669	2.6742	2.69573	2.74311	2.65881	0.706687	6.02953e-05	0.0989085	0.928151	0.000258408	0.668399	0.160158	-0.0113863
5	ENSRNOT00000011263	Dipk2a-201	Dipk2a	6.09413e-09	1.96019e-08	4.99468e-07	2.74989e-07	4.04154e-08	9.02279e-07	7.77025e-08	7.46957e-06	1.92084e-07	4.37768e-07	3.33492e-07	5.56415e-09	1.52949e-06	9.37243e-08	3.97235e-07	1.50021e-06	0.00498285	1.29936e-07	2.51727e-06	3.10129e-07	0.00024998	0.332383	0.331118	0.332669	0.878646	0.391813	0.668399	0.000998638	0.00099595
6	ENSRNOT00000012806	Hsd17b12-201	Hsd17b12	2.72397	2.70802	2.53267	2.62886	2.70959	2.6116	2.6701	2.42959	2.52992	2.67102	2.64959	2.70361	2.68977	2.68961	2.6841	2.60952	1.93656	2.6149	2.54663	2.6823	2.6011	0.591541	0.0757424	0.406897	0.928151	0.151485	0.668399	-0.28353	-0.0817536
7	ENSRNOT00000016121	Sgk1-201	Sgk1	2.2448	2.33745	2.19952	2.41301	2.15625	2.81321	2.58121	2.81287	2.80621	2.69411	2.2363	2.37504	2.07048	2.40357	2.26125	2.78551	2.60553	2.81224	2.7612	2.69404	2.50319	0.912448	3.89889e-08	0.926783	0.928151	1.16967e-06	0.981194	0.933686	-0.0106964
8	ENSRNOT00000017461	Hyal2-201	Hyal2	1.98969	1.98144	2.2681	2.11947	2.11362	2.20903	2.17242	2.35715	2.2436	1.91306	2.22969	2.10953	2.181	2.19192	1.8832	2.29065	2.48486	2.24703	2.11275	2.10641	2.16023	0.479168	0.11836	0.734739	0.928151	0.221924	0.921511	0.213859	0.0938947
9	ENSRNOT00000018464	Tinagl1-201	Tinagl1	1.37058	1.60797	1.9684	2.01931	1.74699	2.221	2.12667	2.2161	2.19427	1.87293	1.47388	1.57953	1.71402	1.8638	1.64642	2.19812	2.30674	2.19295	2.15625	2.05833	1.92671	0.8459	2.55017e-05	0.371979	0.928151	0.00015301	0.668399	0.910489	-0.0308393
10	ENSRNOT00000023965	Mmp9-201	Mmp9	0.75884	0.912221	1.00904	0.668674	0.75697	0.993982	1.00469	1.30882	1.32338	1.07917	1.01734	1.01384	1.07005	1.25756	1.10137	1.19522	1.38	1.36206	1.31619	1.24237	1.08859	0.00135902	0.000207519	0.319246	0.0407705	0.000691729	0.668399	0.527998	0.42804
11	ENSRNOT00000040736	Sgk1-202	Sgk1	8.86046e-06	8.47926e-06	0.021417	0.00728855	1.79724e-05	0.000253685	2.08786e-05	0.075352	0.00368317	1.36257e-05	6.50251e-05	7.94557e-06	0.00893229	7.16534e-05	9.47315e-05	0.00509487	0.271906	0.000345593	0.0233358	1.40743e-05	0.0208966	0.476389	0.234204	0.396803	0.928151	0.351306	0.668399	0.0684215	0.0403608
12	ENSRNOT00000041709	Tspan17-201	Tspan17	2.76792	2.77478	2.79985	2.80265	2.75395	2.84704	2.88986	2.77692	2.83682	2.88267	2.71314	2.75737	2.8064	2.79392	2.77493	2.81646	2.87734	2.77096	2.845	2.88145	2.80847	0.586199	0.00113687	0.948488	0.928151	0.0034106	0.981194	0.135922	-0.0190977
13	ENSRNOT00000047571	Hsd17b12-202	Hsd17b12	0.000454726	0.208094	2.33534	2.21483	0.0672388	1.97428	0.00899267	2.46025	2.32854	0.0170558	2.00038	0.000138558	1.47259	1.27499	1.38118	2.18532	2.59103	1.65798	2.30741	0.00848872	1.32473	0.505145	0.352631	0.892448	0.928151	0.391813	0.981194	0.916823	0.65289
14	ENSRNOT00000061157	Sgk1-203	Sgk1	2.86072e-07	3.23984e-07	2.34556e-06	2.34556e-06	6.09901e-07	3.54755e-06	1.05444e-06	3.00369e-05	2.02658e-06	1.58837e-06	2.89405e-06	1.96002e-07	8.44854e-06	1.34014e-06	1.66479e-06	1.52251	0.00714554	1.16274e-06	1.17118e-05	9.52547e-07	0.0764863	0.329456	0.329441	0.329461	0.878646	0.391813	0.668399	0.305937	0.305927
15	ENSRNOT00000064452	Slc2a1-201	Slc2a1	2.83462	2.80283	2.78233	2.76372	2.8047	2.9235	2.96652	2.8334	2.88395	2.94697	2.63249	2.8064	2.68287	2.69546	2.81872	2.91196	2.84777	2.86133	2.84416	2.94107	2.82924	0.0582173	5.35265e-05	0.417364	0.349304	0.000258408	0.668399	0.267296	-0.100066
16	ENSRNOT00000067374	Nedd9-201	Nedd9	1.30076	1.49371	1.41145	1.45994	1.42693	1.64642	1.63408	1.63142	1.67571	1.59771	1.44972	1.39291	1.38769	1.50983	1.33246	1.64344	1.64597	1.59114	1.62902	1.57775	1.5219	0.631128	1.76728e-07	0.75139	0.928151	2.65092e-06	0.921511	0.421457	-0.0236445
17	ENSRNOT00000078032	Mtmr1-202	Mtmr1	2.42511	2.41774	2.42417	2.40167	2.4228	2.47185	2.54986	2.51788	2.52534	2.53155	2.2348	2.45131	2.17655	2.39227	2.3875	2.38649	2.18187	2.5298	2.38778	2.50527	2.41608	0.0203273	0.053394	0.707816	0.203273	0.114416	0.921511	0.170757	-0.210872
18	ENSRNOT00000078310	Nedd9-202	Nedd9	2.28513e-09	0.105689	1.31872e-06	0.177645	6.19031e-09	8.71106e-07	9.20208e-08	7.27205e-05	1.19925e-06	0.448603	8.51208e-08	0.364429	9.45072e-06	0.0882956	0.225264	7.10164e-07	0.0285188	7.61056e-07	6.16855e-06	0.275105	0.0856822	0.708913	0.75442	0.423319	0.928151	0.808307	0.668399	-0.0418048	0.0499233
19	ENSRNOT00000078502	Zfp189-202	Zfp189	0.419997	1.85943e-05	1.16476e-05	0.000102795	3.18336e-05	7.00061e-05	9.11642e-06	0.00504138	2.35006e-05	6.02243e-05	0.670083	0.520115	0.466988	8.17107e-06	3.03582e-05	0.00102388	0.100534	7.41964e-06	0.000769512	2.053e-05	0.109247	0.123097	0.0287317	0.183346	0.615486	0.0663038	0.668399	-0.393965	0.266843
20	ENSRNOT00000080122	Rnf39-202	Rnf39	0	1.56567e-11	7.05576e-05	0.839194	0	4.07066e-07	9.17314e-08	0	5.04814e-08	0.000267419	0	0.546633	2.91959e-05	2.12012e-06	2.14512e-07	4.08615e-06	0.00809329	9.71028e-08	0.000183856	4.05448e-07	0.0697239	0.779941	0.188002	0.767926	0.928151	0.296845	0.921511	-0.275476	-0.0569173
21	ENSRNOT00000080166	Tinagl1-202	Tinagl1	1.15171e-06	1.42638e-06	3.14086e-05	1.26151e-05	1.64346e-06	1.06076e-05	0.288828	0.521453	7.8244e-06	3.75092e-06	0.171358	7.53603e-07	2.24427e-05	0.154737	0.190771	0.229946	0.138103	0.440511	7.70078e-05	3.08389e-06	0.106794	0.474336	0.136604	0.471535	0.928151	0.241066	0.673621	0.220401	0.103036
22	ENSRNOT00000081353	Hyal2-202	Hyal2	0.856784	1.56213	0.946903	1.87305	3.74463e-05	2.12318	1.67614	2.13296	2.20173	1.91681	1.11768	1.1086	0.992563	1.81764	1.81999	2.09214	0.260379	2.18751	2.29131	1.84817	1.54129	0.928151	0.0252386	0.282637	0.928151	0.0630966	0.668399	1.32699	0.0492496
23	ENSRNOT00000083452	Sgk1-204	Sgk1	1.87205	1.82727	1.874	1.81422	1.78815	1.70552	1.86146	1.74637	1.79472	1.86581	1.79709	1.85861	1.81837	1.77964	1.8787	1.6311	1.54492	1.71207	1.71602	1.71527	1.78007	0.0172209	0.00137347	0.0333932	0.203273	0.00374584	0.668399	-0.202965	-0.139557
24	ENSRNOT00000083700	Slc2a1-202	Slc2a1	9.97762e-06	1.22066e-05	2.47353e-05	2.37113e-05	2.56116e-05	7.72995e-05	1.53263e-05	0.00734519	2.53765e-05	7.12244e-05	4.30086e-05	7.65764e-06	0.00347534	1.42908e-05	2.09529e-05	0.000508127	0.0900942	1.47594e-05	8.98726e-05	2.58808e-05	0.00509624	0.351458	0.310321	0.390306	0.878646	0.391813	0.668399	0.018922	0.0173327
25	ENSRNOT00000084548	Rnf39-203	Rnf39	1.28458	0.867828	0.484628	0	1.14772	1.09667	1.13668	1.12364	0	1.21259	1.004	0.998833	1.23817	0.870202	1.27096	0.493245	0	0.664053	0.543556	1.05393	0.824564	0.90946	0.342046	0.0885675	0.928151	0.391813	0.668399	-0.36851	-0.0434787
26	ENSRNOT00000086380	Tspan17-202	Tspan17	2.64525	2.63274	2.73674	2.67677	2.6742	2.69272	2.58354	2.81938	2.7126	2.52607	2.69605	2.66391	2.72444	2.67954	2.66426	2.64811	2.71276	2.79357	2.71481	2.51974	2.67586	0.749001	0.847002	0.982923	0.928151	0.847002	0.982923	-0.0141203	0.0234398
27	ENSRNOT00000086491	Dipk2a-202	Dipk2a	2.28514	2.19915	2.15149	2.17621	2.28056	2.11711	2.12578	2.00404	2.04693	2.16405	2.29081	2.25063	2.20409	2.13278	2.30552	2.10129	2.009	2.03934	1.98079	2.18377	2.15242	0.868437	0.000185652	0.461688	0.928151	0.000691729	0.673621	-0.300855	-0.0104904
28	ENSRNOT00000088730	Grasp-202	Grasp	1.33836e-07	6.28186e-07	2.33876e-05	3.11547e-06	1.24039e-07	1.87814e-06	4.87357e-07	0.000828613	4.85987e-06	1.50021e-06	2.59192e-06	4.55659e-07	1.47104e-05	1.40408e-06	3.32329e-06	1.11625e-05	0.111762	2.1776e-06	1.26904e-05	1.97049e-06	0.00563386	0.335609	0.328767	0.335568	0.878646	0.391813	0.668399	0.0225155	0.0221895
29	ENSRNOT00000088776	Mmp9-202	Mmp9	9.21316e-06	3.05882e-05	1.3267e-05	1.91079e-06	1.84542e-05	4.55288e-05	1.58837e-06	0.0108488	4.88453e-06	4.24815e-06	2.04377e-06	8.17107e-06	7.77869e-06	4.25618e-06	7.33263e-06	3.78354e-06	0.0478369	4.93917e-06	0.0108143	1.3679e-05	0.00348408	0.330722	0.163556	0.329861	0.878646	0.272593	0.668399	0.0138951	0.00954494
30	ENSRNOT00000090794	Nedd9-203	Nedd9	4.30086e-05	7.33263e-06	9.60833e-06	6.79511e-06	0.236376	5.52109e-05	6.68037e-06	5.80288e-06	4.03574e-06	1.03725	7.51654e-05	0.577398	2.90671e-06	4.10339e-06	0.000154231	0.0218956	0.0203778	1.88499e-07	1.3205e-05	0.000195492	0.0946941	0.596694	0.829044	0.286108	0.928151	0.847002	0.668399	0.0531458	-0.13073

## Sheet: Description
Figure 2-2	List of alternative transcripts of the differentially expressed genes with Ensembl transcript IDs and names, gene symbols, log2(FPKM +1) values in each sample and mean for all samples, uncorrected P and FDR values for all factors, and fold changes for each contrast.
Samples	Group
q1_0 - q5_0	saline left hemisphere
q6_0 - q10_0	L-DOPA left hemisphere
q11_0 - q15_0	saline right hemisphere
q16_0 - q20_0	L-DOPA right hemisphere
